# Supplementary material for: The muraminomicin biosynthetic gene cluster and enzymatic formation of the 2-deoxyaminoribosyl appendage
Source: Royal Society of Chemistry journal article supplement (doi:10.1039/c2md20245j), 2012-09-27
Supplement: c2md20245j.pdf [file c2md20245j.pdf]

## SUPPORTING INFORMATION

### The muraminomicin biosynthetic gene cluster and enzymatic formation of the 2-deoxyaminoribosyl appendage

Xiuling Chi,<sup>a</sup> Satoshi Baba,<sup>b</sup> Nidhi Tibrewal,<sup>a</sup> Masanori Funabashi,<sup>c</sup> Koichi Nonaka,<sup>d</sup> and Steven G. Van Lanen<sup>\*a</sup>

<sup>a</sup> Department of Pharmaceutical Sciences, College of Pharmacy, University of Kentucky, Lexington, KY 40536, United States

<sup>b</sup> Biologics Research Laboratories, R&D Division, Daiichi Sankyo Co. Ltd., Tokyo 140-8710, Japan

<sup>c</sup> Natural Products Research Group, Discovery Science and Technology Department, Drug Discovery and Biomedical Technology Unit, Daiichi Sankyo RD Novare Co., Ltd., Tokyo 134-8630, Japan

<sup>d</sup> Biopharmaceutical Research Group I, Biopharmaceutical Technology Research Laboratories, Pharmaceutical Technology Division, Daiichi Sankyo Co., Ltd., Gunma 370-0503, Japan

\*svanlanen@uky.edu

---

## EXPERIMENTAL PROCEDURES

**Chemicals and instrumentation.** Nucleoside bases, nucleosides, and nucleotides were purchased from Sigma or Promega. Buffers, salts, and media components were purchased from Fisher Scientific. UV/Vis spectroscopy was performed with a Bio-Tek  $\mu$ Quant microplate reader using Microtest™ 96-well plates (BD Biosciences) or a Shimadzu UV/Vis-1800 Spectrophotometer. Synthetic oligonucleotides were purchased from Integrated DNA Technologies (Coralville, IA). DNA sequencing was performed using the BigDye™ Terminator version 3.1 Cycle Sequencing kit from Applied Biosystems, Inc. (Foster City, CA) and analyzed at the University of Kentucky Advanced Genetic Technologies Center. HPLC was performed with a Waters Alliance 2695 separation module (Milford, MA) equipped with a Waters 2998 diode array detector and an analytical Apollo C-18 column (250 mm x 4.6 mm, 5  $\mu$ m) or a semi-preparative Apollo C-18 column (250 mm x 10 mm, 5  $\mu$ m) purchased from Grace (Deerfield, IL). Electrospray ionization-MS was performed using an Agilent 6120 Quadrupole MSD mass spectrometer (Agilent Technologies, Santa Clara, CA) equipped with an Agilent 1200 Series Quaternary LC system and an Eclipse XDB-C18 column (150mm x 4.6 mm, 5  $\mu$ m, 80Å). NMR data were collected using a Varian Unity Inova 300, 400 or 500 MHz Spectrometer (Varian, Inc., Palo Alto, CA).

**Synthesis of substrates.** The synthesis of 5'-amino-5'-deoxyuridine and 5'-amino-2',5'-dideoxyuridine **2** was previously reported.<sup>13</sup> The identical two-step procedure for the latter was used to synthesize 5'-amino-5'-deoxythymidine **4** (see below).

**Step 1: 5'-Azido-5'-deoxythymidine.**  $^1\text{H-NMR}$  (500MHz,  $\text{D}_2\text{O}$ ):  $\delta$  7.55 (s, 1H), 6.27 (t, 1H,  $J = 7$  Hz), 4.51-4.45 (m, 1H), 4.08-4.04 (m, 1H), 3.72-3.51 (m, 2H), 2.50-2.31 (m, 2H), 1.89-1.82 (s, 3H);  $^{13}\text{C-NMR}$  (100MHz,  $\text{D}_2\text{O}$ ):  $\delta$  166.2 (C), 151.4 (C), 136.97 (CH), 111.2 (CH), 84.8 (CH), 84.1 (CH), 70.5 (CH), 51.2 ( $\text{CH}_2$ ), 37.4 ( $\text{CH}_2$ ), 11.2 ( $\text{CH}_3$ ).

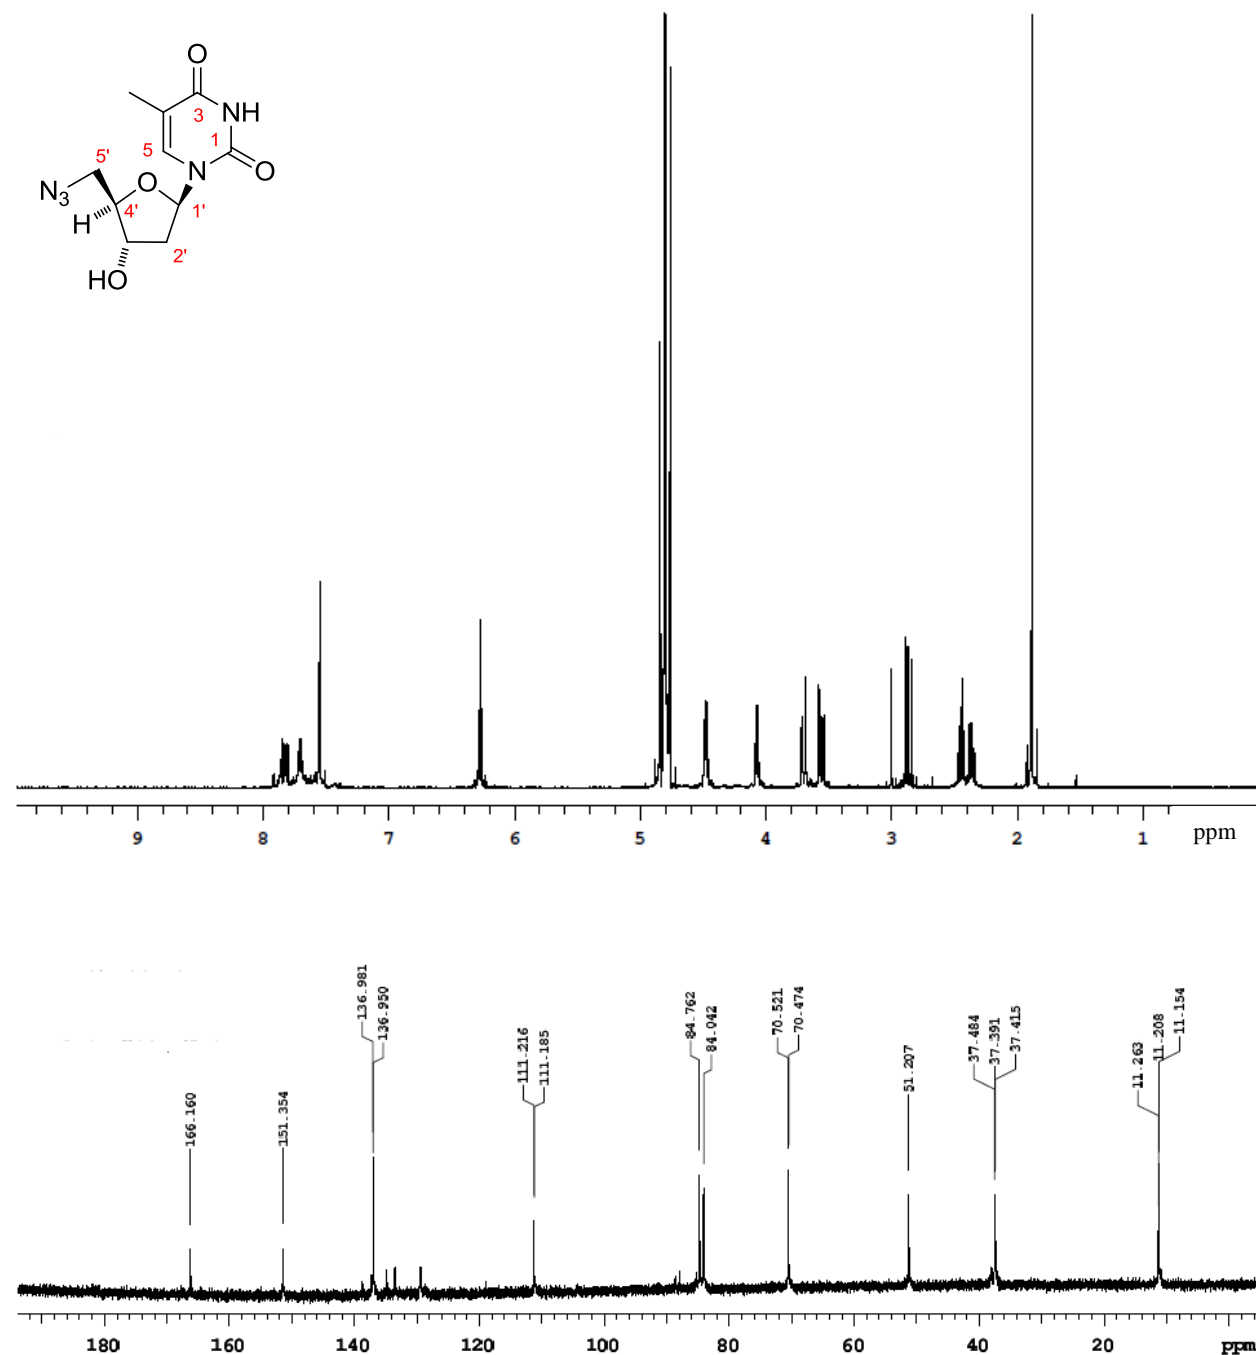

**Step 2: 5'-Amino-5'-deoxythymidine, 2.**  $^1\text{H-NMR}$  (500 MHz,  $\text{D}_2\text{O}$ ):  $\delta$  7.36 (s, 1H), 6.07 (t, 1H,  $J = 7$  Hz), 4.38-4.30 (m, 1H), 4.08-3.95 (m, 1H), 3.35-3.08 (m, 2H), 2.45-2.22 (m, 2H), 1.78-1.70 (s, 3H);  $^{13}\text{C-NMR}$  (125 MHz,  $\text{D}_2\text{O}$ ):  $\delta$  166.1 (C), 151.3 (C), 138.3 (CH), 111.2 (CH), 86.5 (CH), 81.6 (CH), 71.2 (CH), 41.0 ( $\text{CH}_2$ ), 37.3 ( $\text{CH}_2$ ), 11.3 ( $\text{CH}_3$ ). (x: acetate)

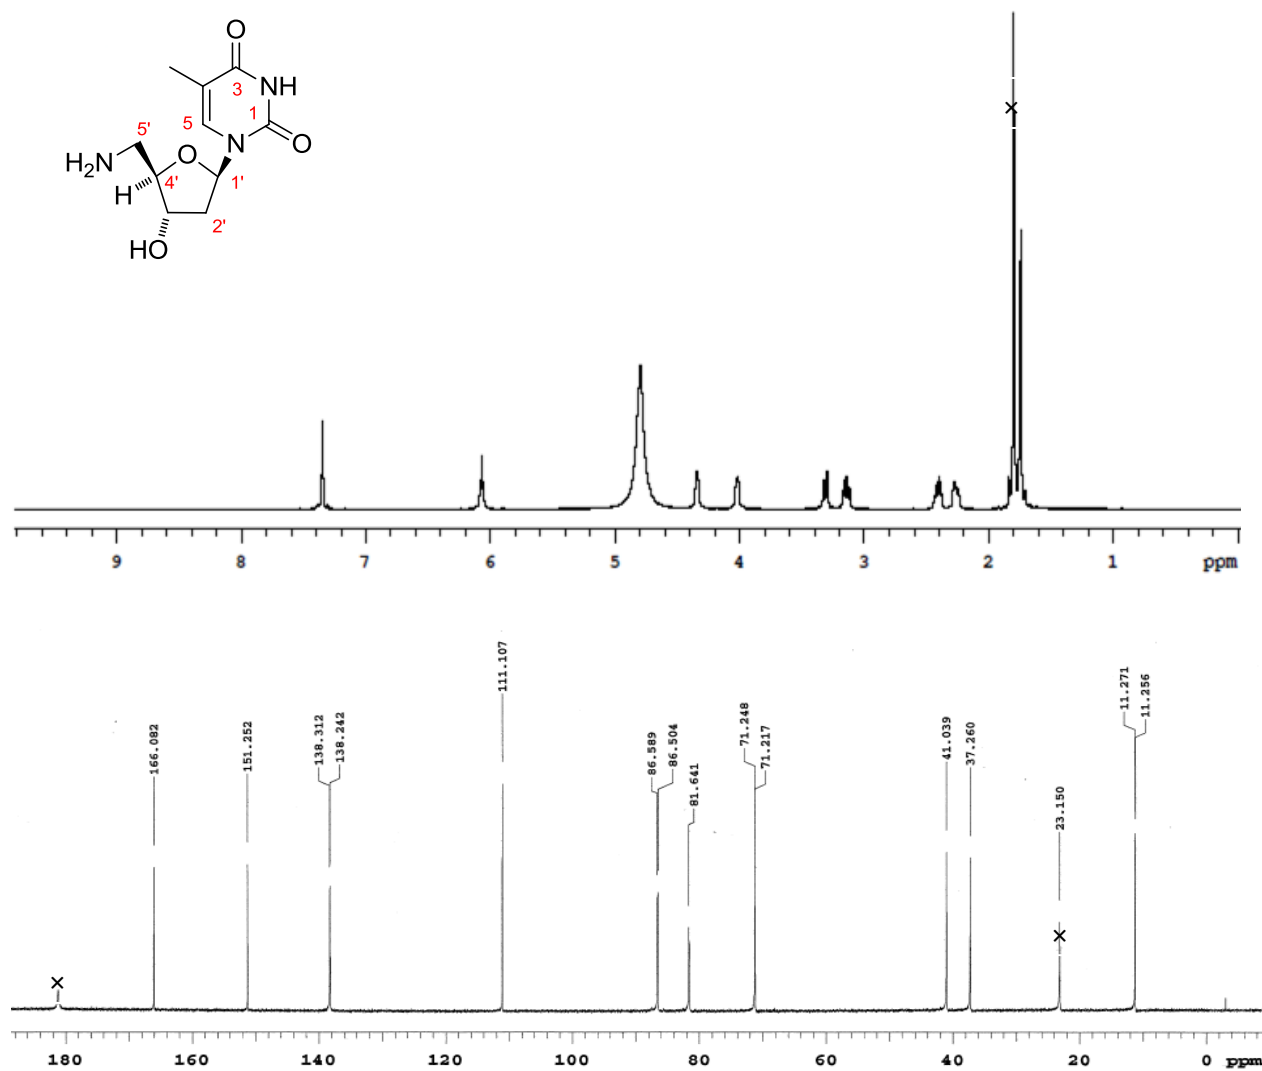

**Cloning of the muraminomicin gene cluster.** *Streptosporangium amethystogenes* sp. SANK 60709 genomic DNA was partially digested with *Sau3AI* to give ~40-kb DNA fragments that were dephosphorylated with bacterial alkaline phosphatase (BAP) and ligated into *Bam*HI-digested cosmid vector SuperCos1-P (Stratagene, Cedar Creek, USA) that contains the loxP site in SuperCos1 and was dephosphorylated by BAP after *Xba*I digestion. The ligation products were packaged with Gigapack III Gold packaging extract as described by the manufacturer (Stratagene), and the resulting recombinant phage was used to transfect *E. coli* XL-1 Blue MR. Approximately 10,000 colonies from the obtained genomic library were screened by colony hybridization using digoxigenin (DIG)-labeled DNA obtained by PCR using degenerate primers as previously described.<sup>15</sup> Hybridization was carried out using DIG easy hyb (Roche, Indianapolis, USA) at 42 °C and the resulting filter was washed under high stringency conditions (0.1 X SSC including 0.1 % SDS, 68 °C). Detection was performed using CDP-Star (Roche) according to the manufacturer's procedures.

Based on restriction digest analysis, four positive cosmids, pMra01-04, were isolated and sequenced using a Roche GS FLX system (Operon Biotechnologies). Potential open reading frames were defined using Frameplot 4.0, and database comparison for sequence homology was performed with BLAST search tools using the National Center for Biotechnology Information (Bethesda, MD). The sequence has been deposited at GenBank under accession no. AB746937.

**Cloning of genes for heterologous expression.** Genes were amplified by PCR using Expand Long Template PCR System from Roche (Indianapolis, IN) with supplied Buffer 2, 200 µM dNTPs, 5% DMSO, 10 ng DNA pMra02, 5 U DNA polymerase, and 200 nM each of the following primer pairs: *mra20* (forward) 5'- GGTATTGAGGGTTCGCATGAACGAGAT -3' / (reverse) 5'- AGAGGAGAGTTAGAGCCTCACCCGG -3' and *mra23* (forward) 5'- GGTATTGAGGGTTCGCATGTCGGTCG -3' / (reverse) 5'- AGAGGAGAGTTAGAG CCTCAGCCGA -3'. The PCR program included an initial hold at 94 °C for 2 min, followed by 30 cycles of 94 °C for 10 s, 56 °C for 15 s, and 68 °C for 60 s. The gel-purified PCR product was inserted into pET-30 Xa/LIC using ligation-independent cloning as described in the provided protocol to yield pET30-*mra20* and pET30-*mra23*. The genes were sequenced to confirm PCR fidelity.

Plasmids were introduced into *E. coli* BL 21(DE3) cells, and the transformed strains were grown in LB supplemented with 50 µg/mL kanamycin. Following inoculation of 500 mL of LB with 50 µg/mL kanamycin, the cultures were grown at 18 °C until the cell density reached an OD<sub>600</sub> ~ 0.5 when expression was induced with 0.1 mM IPTG. Cells were harvested after an overnight incubation at 18 °C and lysed using a French Press with one pass at 15000 psi. Following centrifugation the protein was purified using affinity chromatography with Ni-NTA agarose from Qiagen (Valencia, CA), and the recombinant proteins were desalted into 50 mM Tris-HCl (pH 8), 100 mM NaCl, and 5 % glycerol using a PD-10 desalting column (GE Healthcare). The purified protein was concentrated using an Amicon Ultra 10000 MWCO centrifugal filter (Millipore) and stored as glycerol stocks (40%) at -20 °C. Protein purity was assessed as by 12% acrylamide SDS-PAGE; His<sub>6</sub>-tagged proteins were utilized without further modifications.

**In vitro characterization of Mra20.** Reactions consisted of 25 mM potassium phosphate pH 7.5, 2 mM **2** or analogue, and 100 nM Mra20 at 30 °C, and terminated by the addition of cold TCA to 5% (w/v) or by ultrafiltration using a Microcon YM-3. Following centrifugation to remove protein, the reaction components were analyzed by HPLC using a C-18 reverse-phase column. A series of linear gradients was developed from 40 mM phosphoric acid-triethylamine pH 6.5 (A) to 20% methanol (B) in the following manner (beginning time and ending time with linear

increase to % B): 0-8 min, 0% B; 8-18 min, 60% B; 18-25 min, 95% B; 25-32 min, 95% B; and 32-35 min, 0% B. The flow rate was kept constant at 1.0 mL/min, and elution was monitored at 260 nm.

To determine the kinetic constants with respect to the co-substrate nucleoside, reactions were carried out in 50 mM Tris-HCl pH 9.0 consisting of saturating phosphate (1.5 mM) and variable nucleoside (25 – 5,000  $\mu$ M), and 100 nM Mra20 at 30 °C under initial velocity conditions. The reactions were terminated with 0.1 M sodium hydroxide, and nucleobase formation was determined by UV/Vis spectroscopy with  $\Delta\epsilon_{300\text{ nm}} = 3,700\text{ M}^{-1}$  at pH 13 for **6** and  $\Delta\epsilon_{290\text{ nm}} = 5,700\text{ M}^{-1}$  at pH 13 for **5**.

**In vitro characterization of Mra23.** Reactions consisted of 50 mM potassium phosphate pH 7.5, 5 mM  $\text{MgCl}_2$ , 2 mM **3** or analogue, 5 mM uridine 5'-triphosphate (UTP), 5  $\mu$ M Mra20, and 1  $\mu$ M Mra23 at 30 °C, and the reaction terminated by the addition of cold TCA to 5% (w/v) or by ultrafiltration using a Microcon YM-3. The activity of ORF39 was tested with sugar-1-phosphates generated in situ from synthetic **2**, **3**, **4** or uridine with co-substrate UTP. Following centrifugation to remove protein, the reaction components were analyzed by HPLC using a phosphoric acid-triethylamine mobile phase as described above. LC-MS was performed using a linear gradient from 0.1% formic acid in water to 0.1% formic acid in acetonitrile over 20 min. The flow rate was kept constant at 0.4 mL/min, and elution was monitored at 254 nm.

## SUPPORTING TABLES

**Table S1.** Annotation of ORFs within the muraminomycin gene cluster.

| <i>Protein<sup>a</sup></i> | <i>Size<sup>b</sup></i> | <i>Proposed function</i>                         | <i>Sequence similarity (protein, accession no., origin)</i>                    | <i>Identity / similarity<sup>c</sup></i> | <i>A-90289<sup>d</sup></i> | <i>Identity %</i> |
|----------------------------|-------------------------|--------------------------------------------------|--------------------------------------------------------------------------------|------------------------------------------|----------------------------|-------------------|
| <b>ORF-16</b>              | 258                     | RNA polymerase, sigma 28 subunit, SigD/FlhA/WhiG | SrosDRAFT_47470 (ZP_04474166)<br><i>Streptosporangium roseum</i> DSM 43021     | 93/97                                    |                            |                   |
| <b>ORF-15</b>              | 123                     | anti-anti-sigma factor                           | SrosDRAFT_47460 (ZP_04474165)<br><i>Streptosporangium roseum</i> DSM 43021     | 89/94                                    |                            |                   |
| <b>ORF-14</b>              | 352                     | hypothetical protein                             | SghaA1_010100033943 (ZP_04690229)<br><i>Streptomyces ghanaensis</i> ATCC 14672 | 62/72                                    |                            |                   |
| <b>ORF-13</b>              | 238                     | response regulator                               | SrosDRAFT_47450 (ZP_04474164)<br><i>Streptosporangium roseum</i> DSM 43021     | 89/94                                    |                            |                   |
| <b>ORF-12</b>              | 563                     | PAS domain S-box protein                         | SrosDRAFT_47440 (ZP_04474163)<br><i>Streptosporangium roseum</i> DSM 43021     | 89/95                                    |                            |                   |
| <b>ORF-11</b>              | 393                     | glycosyltransferase                              | SrosDRAFT_47420 (ZP_04474161)<br><i>Streptosporangium roseum</i> DSM 43021     | 83/92                                    |                            |                   |
| <b>ORF-10</b>              | 329                     | hypothetical protein                             | SrosDRAFT_47400 (ZP_04474159)<br><i>Streptosporangium roseum</i> DSM 43021     | 74/82                                    |                            |                   |
| <b>ORF-9</b>               | 243                     | hypothetical protein                             | FRAAL6120 (YP_716259)<br><i>Frankia alni</i> ACN14a                            | 49/65                                    |                            |                   |
| <b>ORF-8</b>               | 361                     | sugar diacid utilization regulator               | SrosDRAFT_47390 (ZP_04474158)<br><i>Streptosporangium roseum</i> DSM 43021     | 79/84                                    |                            |                   |
| <b>ORF-7</b>               | 308                     | L-proline dehydrogenase                          | SrosDRAFT_47380 (ZP_04474157)<br><i>Streptosporangium roseum</i> DSM 43021     | 83/89                                    |                            |                   |
| <b>ORF-6</b>               | 560                     | delta-1-pyrroline-5-carboxylate dehydrogenase    | SrosDRAFT_47370 (ZP_04474156)<br><i>Streptosporangium roseum</i> DSM 43021     | 92/95                                    |                            |                   |
| <b>ORF-5</b>               | 183                     | hypothetical protein                             | SrosDRAFT_40310 (ZP_04473452)<br><i>Streptosporangium roseum</i> DSM 43021     | 84/90                                    |                            |                   |
| <b>ORF-4</b>               | 150                     | DNA-binding protein                              | SrosDRAFT_40320 (ZP_04473453)<br><i>Streptosporangium roseum</i> DSM 43021     | 70/79                                    |                            |                   |
| <b>ORF-3</b>               | 293                     | hypothetical protein                             | SGR_1524 (YP_001823036)<br><i>Streptomyces griseus</i> NBRC 13350              | 49/62                                    |                            |                   |
| <b>ORF-2</b>               | 301                     | NmrA family protein                              | Franean1_1468 (YP_001505814)<br><i>Frankia</i> sp. EAN1pec                     | 65/76                                    |                            |                   |
| <b>ORF-1</b>               | 199                     | tetR-family transcriptional regulator            | Franean1_1469 (YP_001505815)<br><i>Frankia</i> sp. EAN1pec                     | 72/80                                    |                            |                   |
| <b>Mra1</b>                | 394                     | rhamnosyltransferase                             | Cpz31 (ACQ63639)<br><i>Streptomyces</i> sp. MK730-62F2                         | 78/88                                    | LipB1                      | 74                |
| <b>Mra2</b>                | 395                     | sugar <i>O</i> -methyltransferase                | Cpz30 (ACQ63638)<br><i>Streptomyces</i> sp. MK730-62F2                         | 78/82                                    | LipA1                      | 74                |
| <b>Mra3</b>                | 521                     | radical SAM domain-containing protein            | CalU22 (AAM94801)<br><i>Micromonospora echinospora</i>                         | 67/81                                    |                            |                   |
| <b>Mra4</b>                | 382                     | predicted membrane protein                       | NdasDRAFT_4699 (ZP_04335569)<br><i>N. dassonvillei</i> sub. dassonvillei DSM   | 55/67                                    |                            |                   |
| <b>Mra5</b>                | 265                     | sugar <i>O</i> -methyltransferase                | Cpz29 (ACQ63637)<br><i>Streptomyces</i> sp. MK730-62F2                         | 81/89                                    | LipZ                       | 83                |
| <b>Mra6</b>                | 214                     | TmrB-like protein                                | Cpz27 (ACQ63635)<br><i>Streptomyces</i> sp. MK730-62F2                         | 71/80                                    | LipX                       | 67                |
| <b>Mra7</b>                | 399                     | SAM-dependent methyltransferase                  | Cpz26 (ACQ63634)<br><i>Streptomyces</i> sp. MK730-62F2                         | 74/84                                    | LipW                       | 72                |
| <b>Mra8</b>                | 322                     | alcohol dehydrogenase                            | Cpz25 (ACQ63633)<br><i>Streptomyces</i> sp. MK730-62F2                         | 88/93                                    | LipV                       | 86                |
| <b>Mra9</b>                | 600                     | hypothetical protein                             | Cpz24 (ACQ63632)<br><i>Streptomyces</i> sp. MK730-62F2                         | 69/78                                    | LipU                       | 68                |
| <b>Mra10</b>               | 344                     | lipase                                           | Cpz23 (ACQ63631)<br><i>Streptomyces</i> sp. MK730-62F2                         | 78/88                                    | LipT                       | 79                |
| <b>Mra11</b>               | 1226                    | ABC multidrug resistance transporter             | Cpz22 (ACQ63630)<br><i>Streptomyces</i> sp. MK730-62F2                         | 77/84                                    | LipS                       | 76                |
| <b>Mra12</b>               | 490                     | acyltransferase                                  | Cpz21 (ACQ63629)<br><i>Streptomyces</i> sp. MK730-62F2                         | 75/85                                    | LipR                       | 76                |

Table S1 cont.

|              |      |                                                     |                                                                            |       |      |    |
|--------------|------|-----------------------------------------------------|----------------------------------------------------------------------------|-------|------|----|
| <b>Mra13</b> | 354  | acyl-CoA synthase                                   | Cpz20 (ACQ63628)<br><i>Streptomyces</i> sp. MK730-62F2                     | 87/90 | LipQ | 84 |
| <b>Mra14</b> | 422  | SHMT-like (L-Thr:uridine-5'-aldehyde transaldolase) | Cpz14 (ACQ63622)<br><i>Streptomyces</i> sp. MK730-62F2                     | 81/87 | LipK | 83 |
| <b>Mra15</b> | 441  | aminotransferase                                    | Cpz13 (ACQ63621)<br><i>Streptomyces</i> sp. MK730-62F2                     | 77/86 | LipJ | 76 |
| <b>Mra16</b> | 189  | TmrB-like protein                                   | Cpz12 (ACQ63620)<br><i>Streptomyces</i> sp. MK730-62F2                     | 72/81 | LipI | 71 |
| <b>Mra17</b> | 213  | SAM-dependent methyltransferase                     | Cpz11 (ACQ63619)<br><i>Streptomyces</i> sp. MK730-62F2                     | 75/86 | LipH | 78 |
| <b>Mra18</b> | 173  | beta-hydroxylase                                    | Cpz10 (ACQ63618)<br><i>Streptomyces</i> sp. MK730-62F2                     | 84/91 | LipG | 80 |
| <b>Mra19</b> | 329  | AraC family transcriptional regulator               | Cpz9 (ACQ63617)<br><i>Streptomyces</i> sp. MK730-62F2                      | 65/72 | LipF | 61 |
| <b>Mra20</b> | 455  | pyrimidine-nucleoside phosphorylase                 | DealDRAFT_0710 (ZP_03728855)<br><i>Dethiobacter alkaliphilus</i> AHT 1     | 46/63 | LipP | 42 |
| <b>Mra21</b> | 433  | aminotransferase                                    | CetH (ACH85568)<br><i>Actinomyces</i> sp. Lu 9419                          | 52/64 | LipO | 41 |
| <b>Mra22</b> | 367  | glycosyltransferase                                 | Orf13 (BAI23321)<br><i>Streptomyces griseus</i>                            | 39/57 | LipM | 36 |
| <b>Mra23</b> | 232  | nucleotidyltransferase                              | Amir_3895 (YP_003101615)<br><i>Actinosynnema mirum</i> DSM 43827           | 40/51 | LipM | 33 |
| <b>Mra24</b> | 217  | dioxygenase                                         | Orf7 (BAI23315)<br><i>Streptomyces griseus</i>                             | 41/56 | LipL | 40 |
| <b>ORF1</b>  | 328  | DNA polymerase beta domain protein region           | Mpop_3269 (YP_001925955)<br><i>Methylobacterium populi</i> BJ001           | 29/43 |      |    |
| <b>ORF2</b>  | 615  | glucose-methanol-choline oxidoreductase             | SACE_4301 (YP_001106495)<br><i>Saccharopolyspora erythraea</i> NRRL        | 46/58 |      |    |
| <b>ORF3</b>  | 161  | hypothetical protein                                | N9414_23023 (ZP_01630686)<br><i>Nodularia spumigena</i> CCY9414            | 33/48 |      |    |
| <b>ORF4</b>  | 192  | hypothetical protein                                | SrosDRAFT_27630 (ZP_04472191)<br><i>Streptosporangium roseum</i> DSM 43021 | 74/83 |      |    |
| <b>ORF5</b>  | 501  | hydrolase                                           | Svir_18520 (YP_003133702)<br><i>Saccharomonospora viridis</i> DSM 43017    | 62/72 |      |    |
| <b>ORF6</b>  | 181  | NADPH-dependent FMN reductase                       | Pat9bDRAFT_2775 (ZP_05729459)<br><i>Pantoea</i> sp. At-9b                  | 43/65 |      |    |
| <b>ORF7</b>  | 3307 | amino acid adenylation domain-containing protein    | Sare_4562 (YP_001539321)<br><i>Salinispora arenicola</i> CNS-205           | 49/62 |      |    |
| <b>ORF8</b>  | 396  | acyl-CoA dehydrogenase                              | TcurDRAFT_15750 (ZP_04030556)<br><i>Thermomonospora curvata</i> DSM 43183  | 73/84 |      |    |
| <b>ORF9</b>  | 286  | hypothetical protein                                | hyg24 (ABC42561)<br><i>Streptomyces hygroscopicus</i>                      | 43/56 |      |    |
| <b>ORF10</b> | 300  | Short-chain dehydrogenase/reductase                 | Bxe_B2739 (YP_552606)<br><i>Burkholderia xenovorans</i> LB400              | 57/71 |      |    |
| <b>ORF11</b> | 384  | hypothetical protein                                | Plav_2009 (YP_001413280)<br><i>Parvibaculum lavamentivorans</i> DS-1       | 63/78 |      |    |
| <b>ORF12</b> | 140  | hypothetical protein                                | Veis_2934 (YP_997688)<br><i>Verminephrobacter eiseniae</i> EF01-2          | 57/73 |      |    |
| <b>ORF13</b> | 386  | acyl-CoA dehydrogenase                              | TcurDRAFT_39460 (ZP_04032895)<br><i>Thermomonospora curvata</i> DSM 43183  | 50/65 |      |    |

<sup>a</sup>Sequences are deposited at NCBI (accession no. AB746937).

<sup>b</sup>Numbers are in amino acids.

<sup>c</sup>% sequence identity and similarity for the entire length of the proteins.

<sup>d</sup>Sequences are deposited at NCBI (accession no. AB530986).

## SUPPORTING FIGURES

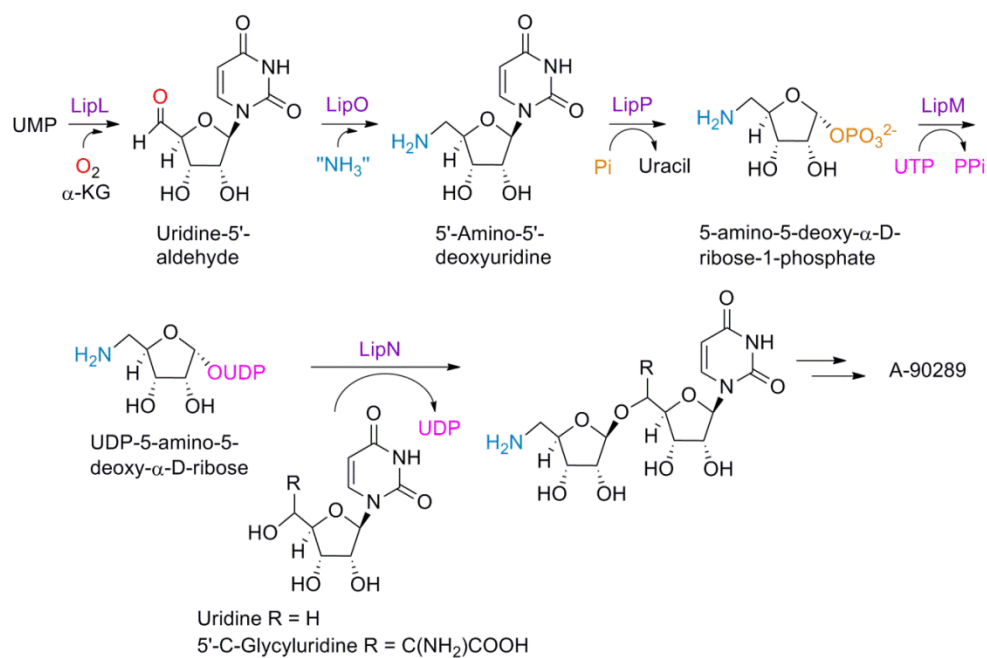

**Figure S1.** Biosynthetic pathway leading to the assembly of the  $\beta(1\rightarrow5)$  disaccharide core of the lipopeptidyl nucleoside antibiotics.



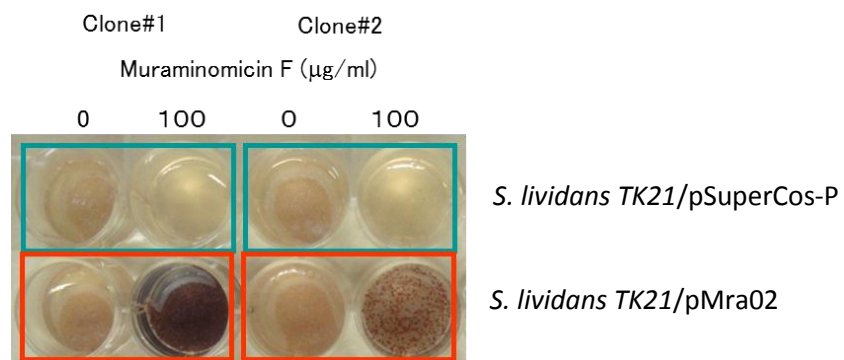

**Figure S2.** Resistance conferred by pMra02 upon heterologous expression in *Streptomyces lividans* TK21.

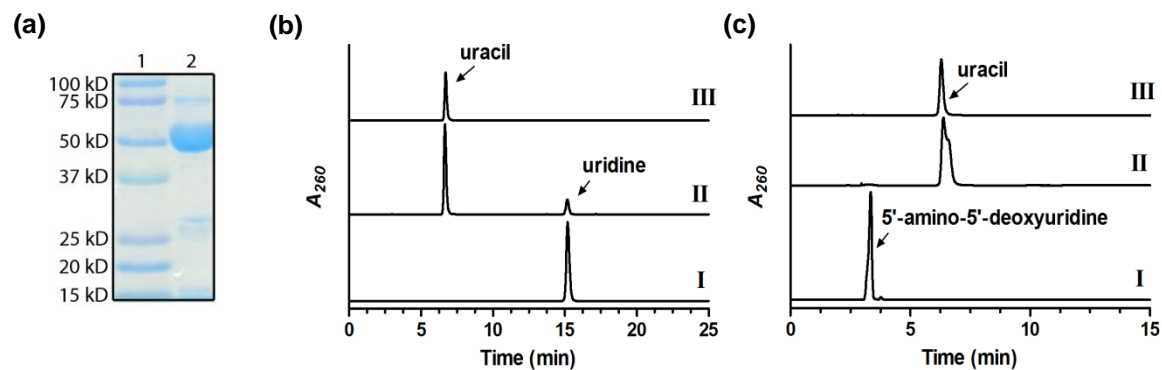

**Figure S3.** *In vitro* characterization of Mra20 (a) SDS-PAGE analysis of partially purified His<sub>6</sub>-Mra20 (expected MW of 52.5 kD). (b) HPLC analysis using uridine after 1 h without Mra20 (I), 1 h reaction (II) and authentic uracil (III). (c) HPLC analysis using 5'-amino-5'-deoxyuridine after 1 h without Mra20 (I), 1 h reaction (II) and authentic uracil (III).  $A_{260}$ , absorbance at 260 nm.

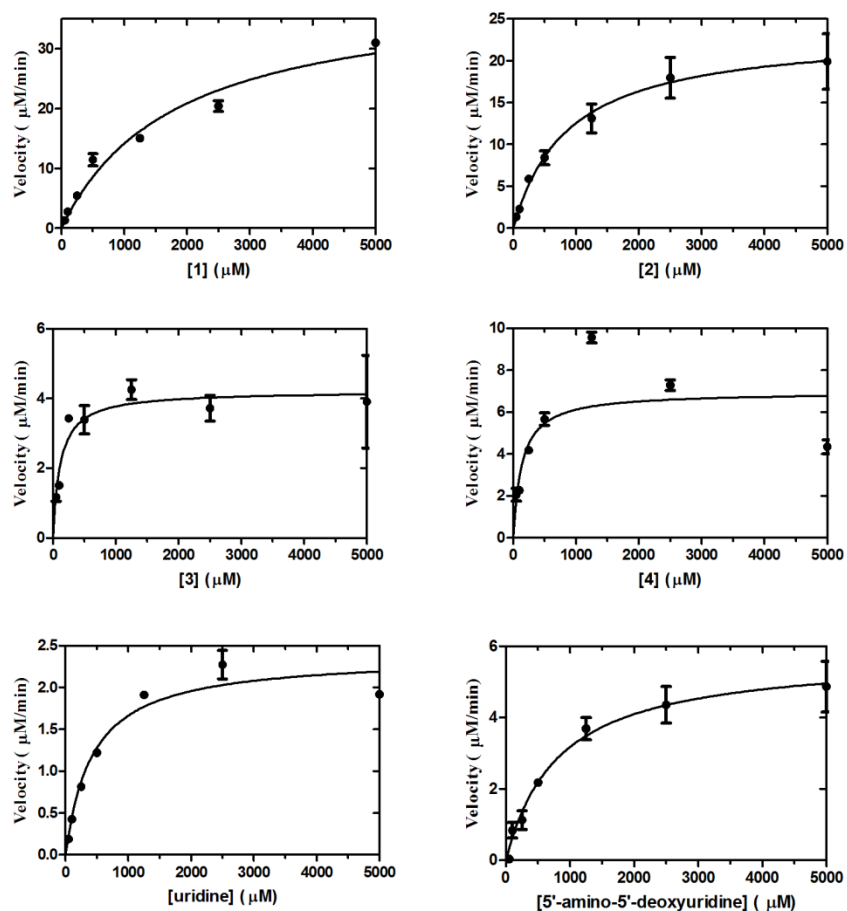

**Figure S4.** Single-substrate kinetic analysis of Mra20. Data were fitted to the Michaelis-Menten equation and extracted kinetic constants are given in Table 1.

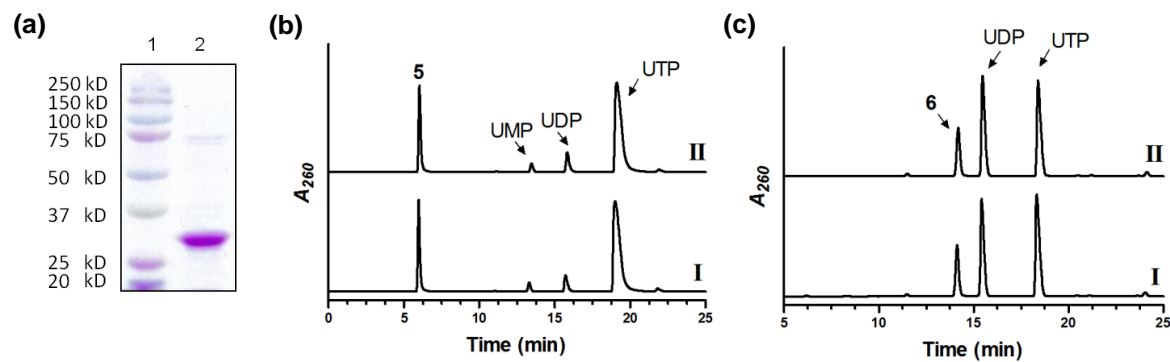

**Figure S5.** *In vitro* characterization of Mra23. (a) SDS-PAGE analysis of purified His<sub>6</sub>-Mra23 (expected MW of 29.6 kD). (b) HPLC analysis of the reaction starting with uridine after 3 h without Mra23 (I) and 3 h reaction (II). (c) HPLC analysis of the reaction starting with **3** after 3 h without Mra23 (I) and 3 h reaction (II).  $A_{260}$ , absorbance at 260 nm.

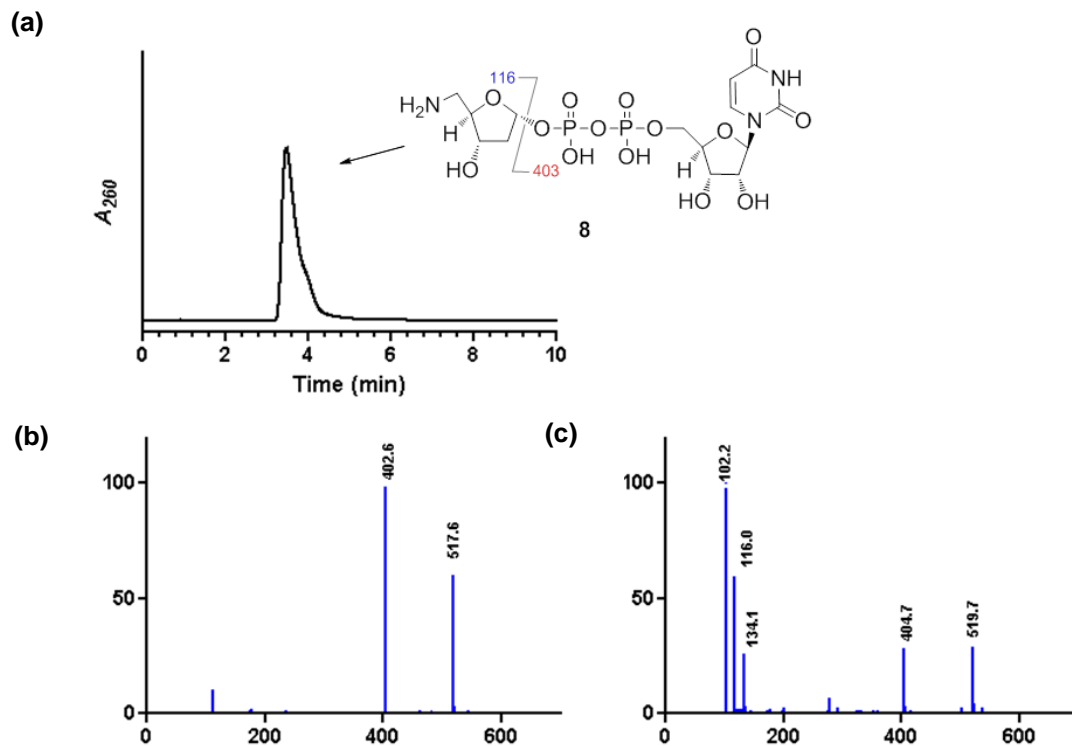

**Figure S6.** LC-MS of the Mra23 product (**7**) generated from substrate **4**. (a) LC analysis of **7** following purification. (b) Negative ion mass spectrum for the peak at elution time  $t = 3.5$  min. (c) Positive ion mass spectrum for the peak at elution time  $t = 3.5$  min.  $A_{260}$ , absorbance at 260 nm.
